# Supplementary material
Source: MDPI journal article supplement (https://www.mdpi.com/2071-1050/14/19/11981)
Supplement: s1 [file s1]

**QUESTIONNAIRE**

**FARMERS' KNOWLEDGE AND PERCEPTION OF INTERCROPPED COCOYAM  
UNDER THE STAND  
(*Xanthosoma sagittifolium*)  
2019**

**IDENTITY NUMBER** : \_\_\_\_\_

**VILLAGE/DISTRICT/ REGENCY** : \_\_\_\_\_

**INTERVIEW DATE** : \_\_\_\_/\_\_\_\_/\_\_\_\_

**INTERVIEWER** : \_\_\_\_\_

**INTERVIEWER NOTES** : \_\_\_\_\_

**I. PERSONAL INFORMATION****Respondent**

1. Name :.....
2. Age :.....years
3. Marital status: a. Single  
b. Married  
c. Widow/Widower/  
Divorce/Divorcee
4. Ethnicity : Sundanese, Java, others  
Please mention  
.....
5. Gender : Female / Male
6. Birth Place :  
a. In this village  
b. In this district (other villages)  
c. In this regency (other districts)  
d. In this province (other regencies)  
e. In this island (other provinces, please  
mention.....)
- f. In this country (other islands, please  
mention.....)
7. If born outside this village, how long have you  
stayed in this village..... years
8. Education Level : .....
9. Primary Job : .....
10. Side job:.....

11. Farming experience:.....years

**Spouse**

12. Name:.....
13. Age : .....years
14. Ethnicity : Sundanese, Java, others.....
15. Gender: Female / Male
16. Place of birth :  
a. In this village  
b. In this district (other villages)  
c. In this regency (other districts)  
d. In this province (other regencies)  
e. In this island (other provinces, please  
mention.....)
- f. In this country (other islands, please  
mention .....
17. If born outside this village, how long have you  
lived in this village..... years
18. Education level :.....years
19. Primary job:.....
20. Side job : .....
21. Number of family dependents... ..person
22. Land ownership:.....ha

## II. COCOYAM FARMERS' KNOWLEDGE AND PERCEPTIONS

| No | Questions                                                                                                                                            | Answers                                                                                                            |
|----|------------------------------------------------------------------------------------------------------------------------------------------------------|--------------------------------------------------------------------------------------------------------------------|
| 1  | Do you know the cocoyam plant?                                                                                                                       |                                                                                                                    |
| 2  | Since when and how did you know about cocoyam?                                                                                                       |                                                                                                                    |
| 3  | What information do you know about the cocoyam? (-physical form, -the use of cocoyam, -cocoyam cultivation, -cocoyam processing, cocoyam marketing?) |                                                                                                                    |
|    | <b>Knowledge about cocoyam cultivation</b>                                                                                                           |                                                                                                                    |
| 4  | Have you planted, or did you ever plant the cocoyam?                                                                                                 | a. yes<br>b. No                                                                                                    |
| 5  | If so, What was the cropping pattern (monoculture or agroforestry)?                                                                                  |                                                                                                                    |
| 6  | What is your purpose in planting cocoyam?                                                                                                            | a. For personal consumption<br>b. For sale<br>c. Other                                                             |
| 7  | Do you know the technology of intercropping cocoyam plants under the tree stands?                                                                    | a. yes<br>b. No                                                                                                    |
| 8  | If so, where did you get the information?                                                                                                            | a. Extension<br>b. Farmer group<br>c. Other farmers who have planted<br>d. Parent<br>e. Newspaper<br>f. Other..... |
| 9  | In your opinion, is the technology for cultivating cocoyam under the stand important?                                                                | a. Important<br>b. Not important                                                                                   |
|    | <b>Knowledge about use and processing of cocoyam</b>                                                                                                 |                                                                                                                    |
| 10 | In your opinion, what parts can be used from the cocoyam?                                                                                            |                                                                                                                    |
| 11 | Have you consumed the cocoyam?                                                                                                                       |                                                                                                                    |
| 12 | How to process the cocoyam before consumption?                                                                                                       |                                                                                                                    |
|    | <b>Knowledge about cocoyam marketing</b>                                                                                                             |                                                                                                                    |
| 13 | Do you sell cocoyam?                                                                                                                                 | a. yes<br>b. No                                                                                                    |
| 14 | If yes, in what form do you sell cocoyam? Raw tubers or processed cocoyam?                                                                           |                                                                                                                    |
| 15 | Where do you sell cocoyam?                                                                                                                           |                                                                                                                    |

### Cocoyam Agroforestry Perception

| No                                                       | Questions                                                                                                          | Not Agree<br>(1) | Neutral<br>(2) | Agree<br>(3) |
|----------------------------------------------------------|--------------------------------------------------------------------------------------------------------------------|------------------|----------------|--------------|
| <b>Perception of agroforestry in cocoyam cultivation</b> |                                                                                                                    |                  |                |              |
| 1.                                                       | Cocoyam can be planted in monoculture or agroforestry (intercropped under the stands)                              |                  |                |              |
| 2.                                                       | Planting cocoyam is very easy                                                                                      |                  |                |              |
| 3.                                                       | Cocoyam is generally propagated vegetatively (shoot seeds, whole tubers, tiller tubers, and tillers)               |                  |                |              |
| 4.                                                       | Cocoyam must be treated intensively (fertilization, mounding, irrigation, weeding, pest and disease control, etc.) |                  |                |              |
| 5.                                                       | Cocoyam requires soil mounding to produce large tubers.                                                            |                  |                |              |
| <b>Perception of cocoyam post-harvest processing</b>     |                                                                                                                    |                  |                |              |
| 6.                                                       | Cocoyam is very easy to be processed                                                                               |                  |                |              |
| 7.                                                       | Cocoyam is processed in a modest way (steamed, boiled, made into chips, fried cocoyam nuggets).                    |                  |                |              |
| 8.                                                       | Cocoyam is often used for traditional events (7 months baby shower, cattle festival)?                              |                  |                |              |
| 9.                                                       | Cocoyam processed into chips is more profitable (economically)                                                     |                  |                |              |
| 10.                                                      | Harvested tubers can be stored for a long period                                                                   |                  |                |              |
| <b>Perception of cocoyam marketing</b>                   |                                                                                                                    |                  |                |              |
| 11.                                                      | Cocoyam tubers can be sold directly                                                                                |                  |                |              |
| 12.                                                      | Many dealers/middle-man buy cocoyam tubers                                                                         |                  |                |              |
| 13.                                                      | There has been reasonable price of selling cocoyam tubers (can cover the production costs)                         |                  |                |              |
| 14.                                                      | The selling price of cocoyam chips is better (expensive) than cocoyam raw tubers                                   |                  |                |              |
| 15.                                                      | Cocoyam is more accessible to be sold in the form of tubers than in the form of chips                              |                  |                |              |
